# Supplementary material for: Effects of Post-Curing Light Intensity on the Mechanical Properties and Three-Dimensional Printing Accuracy of Interim Dental Material
Source: MDPI journal article supplement (doi:10.3390/ma15196889), 2022-10-04
Supplement: s1 [file s1]

Supplementary

# Effects of Post-curing Light Intensity on the Mechanical Properties and Three-Dimensional Printing Accuracy of Interim Dental Material

Min-Jung Kang †, Jung-Hwa Lim †, Chan-Gyu Lee, and Jong-Eun Kim \*

Table S1. Mean  $\pm$  SD values on flexural strength and modulus.

| Group | Post-Curing time | Flexural Strength (MPa) | Flexural Modulus (GPa) |
|-------|------------------|-------------------------|------------------------|
| GS    | -                | 10.49 $\pm$ 0.97        | 0.16 $\pm$ 0.02        |
| G20   | 5min             | 84.11 $\pm$ 11.87       | 2.79 $\pm$ 0.09        |
|       | 10min            | 97.64 $\pm$ 3.98        | 3.23 $\pm$ 0.11        |
|       | 20min            | 95.75 $\pm$ 2.86        | 3.13 $\pm$ 0.21        |
| G60   | 5min             | 99.24 $\pm$ 8.97        | 3.38 $\pm$ 0.10        |
|       | 10min            | 104.42 $\pm$ 4.60       | 3.54 $\pm$ 0.20        |
|       | 20min            | 106.24 $\pm$ 5.45       | 3.64 $\pm$ 0.22        |
| G80   | 5min             | 105.05 $\pm$ 7.65       | 3.40 $\pm$ 0.22        |
|       | 10min            | 106.37 $\pm$ 8.50       | 3.80 $\pm$ 0.20        |
|       | 20min            | 116.60 $\pm$ 8.82       | 4.17 $\pm$ 0.41        |
| G120  | 5min             | 101.98 $\pm$ 9.51       | 3.48 $\pm$ 0.10        |
|       | 10min            | 109.35 $\pm$ 2.02       | 3.70 $\pm$ 0.09        |
|       | 20min            | 112.39 $\pm$ 2.58       | 3.99 $\pm$ 0.07        |

Table S2. Mean  $\pm$  SD values on Vickers microhardness

| Group | Post-Curing time | Surface Hardness (VHN) |
|-------|------------------|------------------------|
| GS    | -                | 1.67 $\pm$ 0.18        |
| G20   | 5min             | 10.10 $\pm$ 0.65       |
|       | 10min            | 10.66 $\pm$ 0.61       |
|       | 20min            | 10.65 $\pm$ 0.46       |
| G60   | 5min             | 11.23 $\pm$ 0.70       |
|       | 10min            | 11.39 $\pm$ 0.68       |
|       | 20min            | 11.84 $\pm$ 0.45       |
| G80   | 5min             | 12.03 $\pm$ 0.65       |
|       | 10min            | 11.94 $\pm$ 0.51       |
|       | 20min            | 12.08 $\pm$ 0.50       |
| G120  | 5min             | 12.21 $\pm$ 0.49       |
|       | 10min            | 12.26 $\pm$ 0.37       |
|       | 20min            | 12.86 $\pm$ 0.39       |

**Table S3.** Mean  $\pm$  SD RMSE values on the accuracy of the three-unit bridge.

| Group | Post-Curing time | RMSE ( $\mu\text{m}$ ) |
|-------|------------------|------------------------|
| G20   | 5min             | 80.34 $\pm$ 3.62       |
|       | 10min            | 75.56 $\pm$ 4.39       |
|       | 20min            | 76.66 $\pm$ 2.96       |
| G60   | 5min             | 82.00 $\pm$ 4.84       |
|       | 10min            | 85.06 $\pm$ 6.09       |
|       | 20min            | 79.40 $\pm$ 6.83       |
| G80   | 5min             | 76.48 $\pm$ 7.92       |
|       | 10min            | 82.58 $\pm$ 7.15       |
|       | 20min            | 79.90 $\pm$ 4.66       |
| G120  | 5min             | 76.50 $\pm$ 6.54       |
|       | 10min            | 80.88 $\pm$ 5.63       |
|       | 20min            | 78.44 $\pm$ 5.92       |
